# Supplementary material for: Integrating cryo-OrbiSIMS with computational modelling and metadynamics simulations enhances RNA structure prediction at atomic resolution
Source: PubMed Central journal article supplement (PMC11111741; doi:10.1038/s41467-024-48694-3), 2024-05-22
Supplement: 41467_2024_48694_MOESM5_ESM.pdf [file 41467_2024_48694_MOESM5_ESM.pdf]

## Reporting Summary

Nature Portfolio wishes to improve the reproducibility of the work that we publish. This form provides structure for consistency and transparency in reporting. For further information on Nature Portfolio policies, see our [Editorial Policies](#) and the [Editorial Policy Checklist](#).

### Statistics

For all statistical analyses, confirm that the following items are present in the figure legend, table legend, main text, or Methods section.

- |                                     |                                                                                                                                                                                                                                                                                                |
|-------------------------------------|------------------------------------------------------------------------------------------------------------------------------------------------------------------------------------------------------------------------------------------------------------------------------------------------|
| n/a                                 | Confirmed                                                                                                                                                                                                                                                                                      |
| <input type="checkbox"/>            | <input checked="" type="checkbox"/> The exact sample size ( $n$ ) for each experimental group/condition, given as a discrete number and unit of measurement                                                                                                                                    |
| <input type="checkbox"/>            | <input checked="" type="checkbox"/> A statement on whether measurements were taken from distinct samples or whether the same sample was measured repeatedly                                                                                                                                    |
| <input type="checkbox"/>            | <input checked="" type="checkbox"/> The statistical test(s) used AND whether they are one- or two-sided<br><i>Only common tests should be described solely by name; describe more complex techniques in the Methods section.</i>                                                               |
| <input type="checkbox"/>            | <input checked="" type="checkbox"/> A description of all covariates tested                                                                                                                                                                                                                     |
| <input checked="" type="checkbox"/> | <input type="checkbox"/> A description of any assumptions or corrections, such as tests of normality and adjustment for multiple comparisons                                                                                                                                                   |
| <input type="checkbox"/>            | <input checked="" type="checkbox"/> A full description of the statistical parameters including central tendency (e.g. means) or other basic estimates (e.g. regression coefficient) AND variation (e.g. standard deviation) or associated estimates of uncertainty (e.g. confidence intervals) |
| <input type="checkbox"/>            | <input checked="" type="checkbox"/> For null hypothesis testing, the test statistic (e.g. $F$ , $t$ , $r$ ) with confidence intervals, effect sizes, degrees of freedom and $P$ value noted<br><i>Give <math>P</math> values as exact values whenever suitable.</i>                            |
| <input checked="" type="checkbox"/> | <input type="checkbox"/> For Bayesian analysis, information on the choice of priors and Markov chain Monte Carlo settings                                                                                                                                                                      |
| <input checked="" type="checkbox"/> | <input type="checkbox"/> For hierarchical and complex designs, identification of the appropriate level for tests and full reporting of outcomes                                                                                                                                                |
| <input type="checkbox"/>            | <input checked="" type="checkbox"/> Estimates of effect sizes (e.g. Cohen's $d$ , Pearson's $r$ ), indicating how they were calculated                                                                                                                                                         |

*Our web collection on [statistics for biologists](#) contains articles on many of the points above.*

### Software and code

Policy information about [availability of computer code](#)

Data collection

Data analysis

For manuscripts utilizing custom algorithms or software that are central to the research but not yet described in published literature, software must be made available to editors and reviewers. We strongly encourage code deposition in a community repository (e.g. GitHub). See the Nature Portfolio [guidelines for submitting code & software](#) for further information.

### Data

Policy information about [availability of data](#)

All manuscripts must include a [data availability statement](#). This statement should provide the following information, where applicable:

- Accession codes, unique identifiers, or web links for publicly available datasets
- A description of any restrictions on data availability
- For clinical datasets or third party data, please ensure that the statement adheres to our [policy](#)

nott.7354] and can also be made available upon request from the corresponding author. All processed data supporting the findings of this study is provided within the main text and supplementary information. The following Protein Data Bank entries were used to benchmark the cryo-OrbiSIMS modelled 2D and 3D structures: (1) PDB ID 4ZT9 for Cas9:sg complex [<https://doi.org/10.2210/pdb4ZT9/pdb>], (2) PDB ID 6GWT [<https://doi.org/10.2210/pdb6GWT/pdb>] for bacterial ribosome complex, and (3) PDB IDs 5IEM [<https://doi.org/10.2210/pdb5IEM/pdb>], 5LYS [<https://doi.org/10.2210/pdb5LYS/pdb>], 5LYU [<https://doi.org/10.2210/pdb5LYU/pdb>], 5LYV [<https://doi.org/10.2210/pdb5LYV/pdb>], 6MCI [<https://doi.org/10.2210/pdb6MCI/pdb>], 6MCF [<https://doi.org/10.2210/pdb6MCF/pdb>], 6DCB [<https://doi.org/10.2210/pdb6DCB/pdb>], 6DCC [<https://doi.org/10.2210/pdb6DCC/pdb>], 2KX8 [<https://doi.org/10.2210/pdb2KX8/pdb>], 6D12 [<https://doi.org/10.2210/pdb6D12/pdb>], 7SLP [<https://doi.org/10.2210/pdb7SLP/pdb>] and 7SLQ [<https://doi.org/10.2210/pdb7SLQ/pdb>] for the 7SK RNP complex. Additionally, DMS probing dataset [<https://doi.org/10.7554/eLife.22037>] and IM7 probing dataset from RMDB 5SRRNA\_IM7\_0006 [[https://rmdb.stanford.edu/detail/5SRRNA\\_1M7\\_0006](https://rmdb.stanford.edu/detail/5SRRNA_1M7_0006)] were used for performance comparison of cryo-OrbiSIMS with these techniques.

## Research involving human participants, their data, or biological material

Policy information about studies with [human participants or human data](#). See also policy information about [sex, gender \(identity/presentation\), and sexual orientation](#) and [race, ethnicity and racism](#).

Reporting on sex and gender

Reporting on race, ethnicity, or other socially relevant groupings

Population characteristics

Recruitment

Ethics oversight

Note that full information on the approval of the study protocol must also be provided in the manuscript.

## Field-specific reporting

Please select the one below that is the best fit for your research. If you are not sure, read the appropriate sections before making your selection.

Life sciences  Behavioural & social sciences  Ecological, evolutionary & environmental sciences

For a reference copy of the document with all sections, see [nature.com/documents/nr-reporting-summary-flat.pdf](https://nature.com/documents/nr-reporting-summary-flat.pdf)

## Life sciences study design

All studies must disclose on these points even when the disclosure is negative.

Sample size

Data exclusions

Replication

Randomization

Blinding

## Reporting for specific materials, systems and methods

We require information from authors about some types of materials, experimental systems and methods used in many studies. Here, indicate whether each material, system or method listed is relevant to your study. If you are not sure if a list item applies to your research, read the appropriate section before selecting a response.

## Materials &amp; experimental systems

## Methods

| n/a                                 | Involved in the study                                     |
|-------------------------------------|-----------------------------------------------------------|
| <input type="checkbox"/>            | <input checked="" type="checkbox"/> Antibodies            |
| <input type="checkbox"/>            | <input checked="" type="checkbox"/> Eukaryotic cell lines |
| <input checked="" type="checkbox"/> | <input type="checkbox"/> Palaeontology and archaeology    |
| <input checked="" type="checkbox"/> | <input type="checkbox"/> Animals and other organisms      |
| <input checked="" type="checkbox"/> | <input type="checkbox"/> Clinical data                    |
| <input checked="" type="checkbox"/> | <input type="checkbox"/> Dual use research of concern     |
| <input checked="" type="checkbox"/> | <input type="checkbox"/> Plants                           |

| n/a                                 | Involved in the study                           |
|-------------------------------------|-------------------------------------------------|
| <input checked="" type="checkbox"/> | <input type="checkbox"/> ChIP-seq               |
| <input checked="" type="checkbox"/> | <input type="checkbox"/> Flow cytometry         |
| <input checked="" type="checkbox"/> | <input type="checkbox"/> MRI-based neuroimaging |

## Antibodies

## Antibodies used

Secondary antibodies:  
Anti mouse IgG (whole molecule) – HRP (produced in Goat) A4416 P code 1003321740, Source SLCK7186, Sigma Aldrich

## Primary antibodies:

HEXIM1 Rabbit polyclonal IgG Catalog number 15676-1-AP, Lot number 00006924, Proteintech  
Genbank accession number: BC006460  
Immunogen catalog number: Ag8144  
Gene ID (NCBI): 10614

CDK9 Rabbit polyclonal IgG 11705-1-AP, Lot 00047991, Proteintech  
Genbank accession number: BC001968  
Immunogen catalog number: Ag2318  
Gene ID (NCBI): 1025

Cyclin T1 Rabbit polyclonal IgG 20992-1-AP, Lot 00016402 Proteintech  
Genbank accession number: NM\_001240  
Gene ID (NCBI): 904

HSP90 13171-1-AP, Lot 00057547, Proteintech  
Genbank accession number: BC023006  
Gene ID (NCBI): 3320

## Validation

All primary antibodies were sourced from verified suppliers, and each primary antibody was validated for use by the manufacturer. Detailed information, including validation tests and link to publications, is available on the suppliers website, accessed via the following links.

HEXIM1 Rabbit polyclonal IgG: <https://www.ptglab.com/products/HEXIM1-Antibody-15676-1-AP.htm>

CDK9 Rabbit polyclonal IgG: <https://www.ptglab.com/products/CDK9-Antibody-11705-1-AP.htm>

Cyclin T1 Rabbit polyclonal IgG: <https://www.ptglab.com/products/CCNT1-Antibody-20992-1-AP.htm>

HSP90 Rabbit polyclonal IgG: <https://www.ptglab.com/products/HSP90-Antibody-13171-1-AP.htm>

## Eukaryotic cell lines

Policy information about [cell lines and Sex and Gender in Research](#)

## Cell line source(s)

Two batches of commercial HeLa cell lines donated by members of the author's institution were used in this study. Batch 1 was retrieved from passage no. 18, dated 12/09/12. Batch 2 was donated on 01/10/2019

## Authentication

None of the cell lines were authenticated

## Mycoplasma contamination

Cell lines were not tested for mycoplasma contamination as this is not relevant to growing cells purely for protein extraction.

Commonly misidentified lines  
(See [ICLAC](#) register)

N/A

## Plants

---

Seed stocks

n/a

Novel plant genotypes

n/a

Authentication

n/a
